# Supplementary material for: Antisense lncRNA NNT-AS1 Promoted Esophageal Squamous Cell Carcinoma Progression by Regulating Its Sense Gene NNT Expression
Source: Research Square preprint supplement (doi:10.21203/rs.3.rs-903062/v1), 2021-09-21
Supplement: Supplementary file 1 [file 6eb643ed5cefd0106100d7fd.docx]

|  | Sequence | supplier |
| --- | --- | --- |
| si-NNT-AS1-1# | sense: CAUCUGCUUCUGGUGACAACCUCAATT | PROTEINBIO, Nanjing, China |
|  | antisense: UUGAGGUUGUCACCAGAAGCAGAUG |
| si-NNT-AS1-2# | sense: GAAGGACAGACAAACUGUAACCUUUTT |
|  | antisense: AAAGGUUACAGUUUGUCUGUCCUUCTT |
| si-NNT -1# | sense: GCACCUUUGUUGGUGGAUAUUT |
|  | antisense: AAUAUCCACCAACAAAGGUGCTT |
| si-NNT -2# | sense: CCCUAUGGUUAAUCCAACAUUTT |
|  | antisense: AAUGUUGGAUUAACCAUAGGGTT |
| si-NNT -3# | sense: CGAGAAGCUAAUAGCAUUAUUTT |
|  | antisense: AAUAAUGCUAUUAGCUUCUCGT |
| miR-382-5p mimics | forward: GAAGUUGUUCGUGGUGGAUUGG | TSINGKE, Nanjing, China |
|  | reverse: AAUCCACCACGAACAACUUCUU |
| mimics NC | forward: CTCGCTTCGGCAGCACA |
|  | reverse: AACGCTTCACGAATTTGCGT |
| miR-382-5p inhibitor | CGAAUCCACCACGAACAACUUC |
| inhibitor NC | CAGUACUUUUGUGUAGUACAA |
| NNT-AS1 forward | ACGTGCAGACAACATCTACCT | GENERAY, Shanghai, China |
| NNT-AS1 reverse | TACAACACCTTCCCGCAT |
| NNT forward | TGGTCAAGCAGGGTTTTAATGT |
| NNT reverse | TCCTTTGCCCCTTGGATTTGG- |
| miR-382-5p forward | ATCCGTGAAGTTGTTCGTGG |
| miR-382-5p reverse | TATGGTTGTAGAGGACTCCTTGAC |
| GAPDH forward: | GAAGTGTGAAGGTCGGAGTC |
| GAPDH reverse | GAAGATGGTGATGGGATTTC |

Supplementary Table 1. The sequences of siRNAs, miRNAs, and primers

Supplementary Table 2. The sequence of shNNT-AS1

|  | 5’ | stem | loop | stem | 3’ |
| --- | --- | --- | --- | --- | --- |
| shNNT-AS1-a | Ccgg | CATCTGCTTCTGGTGACAACCTCAA | CTCGAG | TTGAGGTTGTCACCAGAAGCAGATG | TTTTTg |
| shNNT-AS1-b | aattcaaaaa | CATCTGCTTCTGGTGACAACCTCAA | CTCGAG | TTGAGGTTGTCACCAGAAGCAGATG |  |


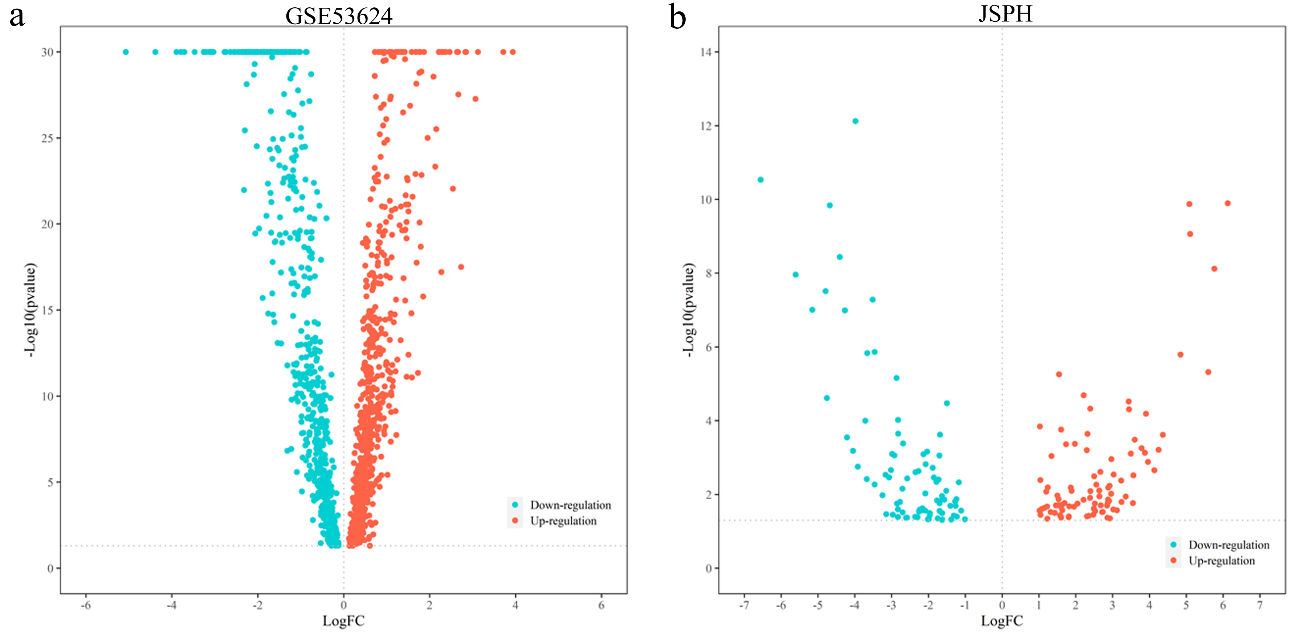
Supplementary Figure 1. Differentially expressed antisense lncRNAs in GSE53624 and JSPH.
